# Supplementary material for: How change in chirality prevents β-amyloid type interaction in a protonated cyclic dipeptide dimer
Source: Royal Society of Chemistry journal article supplement (doi:10.1039/d2cp03110h), 2022-01-01
Supplement: d2cp03110h1.pdf [file d2cp03110h1.pdf]

# How Change in Chirality Prevents $\beta$ -Amyloid Type Interaction in a Protonated Cyclic Dipeptide Dimer

*Katia Le Barbu-Debus, <sup>a)</sup>Ariel Pérez-Mellor, <sup>a)b)</sup> Valéria Lepère, <sup>a)</sup> Anne Zehnacker <sup>a)\*</sup>*

a) Institut des Sciences Moléculaires d'Orsay (ISMO), CNRS, Université Paris-Saclay, F-91405 Orsay, France

b) Current affiliation: Department of Physical Chemistry, University of Geneva, 1211 Geneva, Switzerland

\* [anne.zehnacker-rentien@universite-paris-saclay.fr](mailto:anne.zehnacker-rentien@universite-paris-saclay.fr)

## Supplementary Information

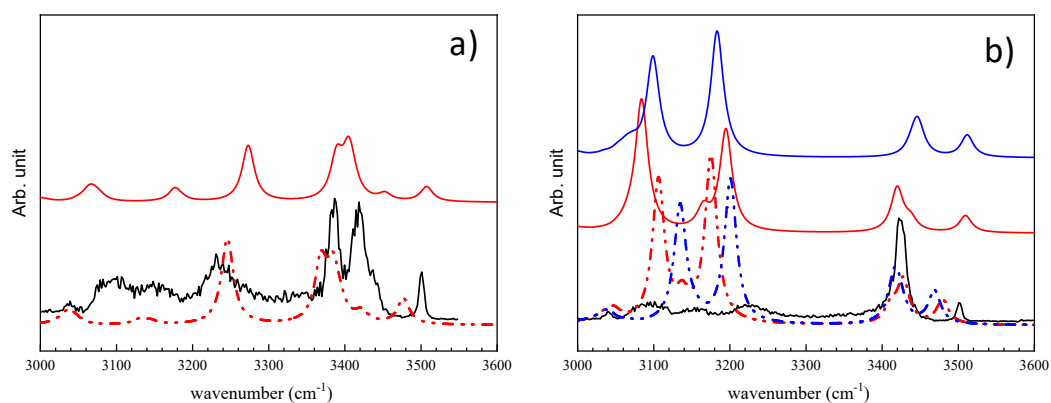

**Figure S1:** comparison between the IR absorption spectra simulated at the ri-b97-d-D3BJ/def2-TZVPPD (full lines) and the B3LYPD3BJ/6-311++G(d,p) levels of theory (dotted lines) in the hydride stretch region. a) c-(LD)<sub>2</sub>H<sup>+</sup> Experimental spectrum (black line) Simulated spectra of π-(c-LD)<sub>2</sub>H<sup>+</sup> (red line) b) c-(LL)<sub>2</sub>H<sup>+</sup> Experimental spectrum (black line) Simulated spectra of π-(c-LL)<sub>2</sub>H<sup>+</sup> (red line) and τ-(c-LL)<sub>2</sub>H<sup>+</sup> (blue line)

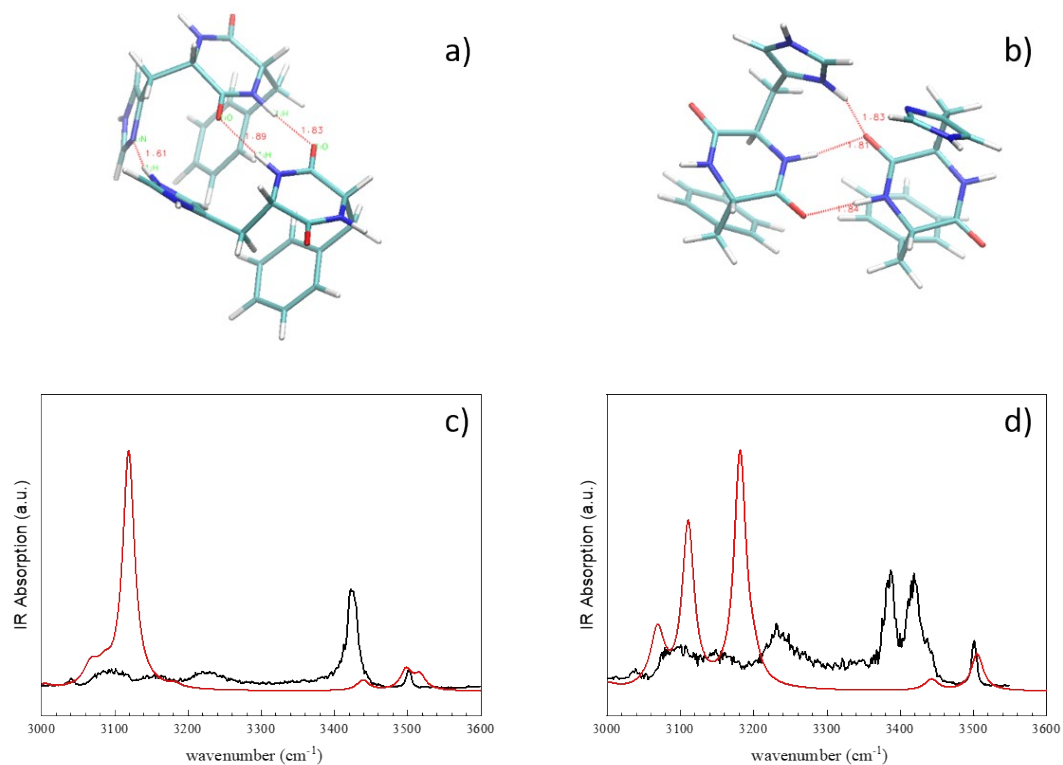

**Figure S2:** Most stable structures of the protonated dimers a)  $(c\text{-LD})_2\text{H}^+$  and b)  $(c\text{-LL})_2\text{H}^+$  calculated at the ri-b97-d-D3BJ/def2-TZVPPD level of theory in a solvent continuum. Simulated IR absorption spectra for c) the most stable  $(c\text{-LD})_2\text{H}^+$  structure and d) the most stable  $(c\text{-LL})_2\text{H}^+$  structure. The frequencies are scaled by 0.978.

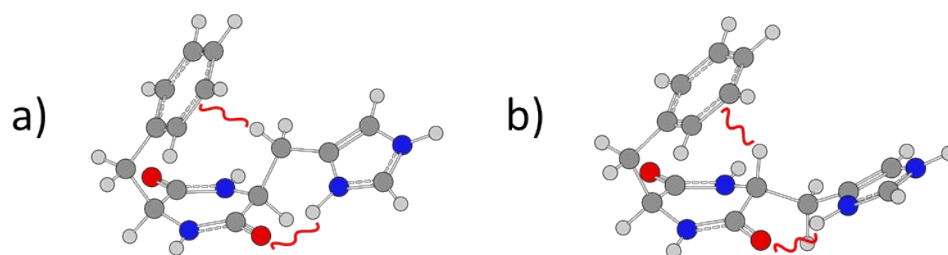

**Figure S3:** Most stable structures of the protonated monomer a) (c-LL) $H^+$  and b) (c-LD) $H^+$  calculated at the B3LYP-D3/6311++G(d,p) level of theory.
